# Supplementary material for: Epitaxtial lift-off for freestanding InGaN/GaN membranes and vertical blue light-emitting-diodes
Source: Royal Society of Chemistry journal article supplement (doi:10.1039/d0tc01986k), 2020-01-01
Supplement: d0tc01986k1.pdf [file d0tc01986k1.pdf]

*Electronic supplementary information (ESI)*

## **Epitaxial lift-off for freestanding InGaN/GaN membrane and vertical blue light-emitting-diode**

Jian Jiang,<sup>a</sup> Jianqi Dong,<sup>a</sup> Baoyu Wang,<sup>a</sup> Chenguang He,<sup>b</sup> Wei Zhao,<sup>b</sup> Zhitao Chen,<sup>b</sup> Kang  
Zhang,<sup>b,†</sup> and Xingfu Wang,<sup>a,†</sup>

<sup>a</sup>Laboratory of Nanophotonic Functional Materials and Devices, Institute of Semiconductors and  
Technology, South China Normal University, Guangzhou 510651, People's Republic of China.

<sup>b</sup>Guangdong Institute of Semiconductor Industrial Technology, Guangdong academy of science,  
Guangzhou, 510651, China.

† Corresponding authors.

Email: kangzhang@gdisit.com (K.Z.); xfwang@scnu.edu.cn (X.W.)

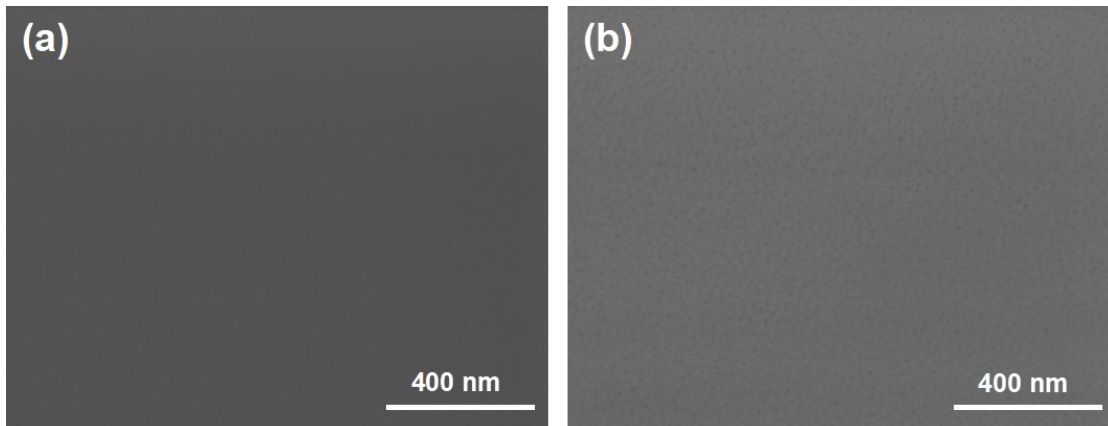

**Fig. S1** The corresponding high-resolution SEM images for both the top (a) and bottom (b) surface of the transferred InGaN/GaN membranes LED.

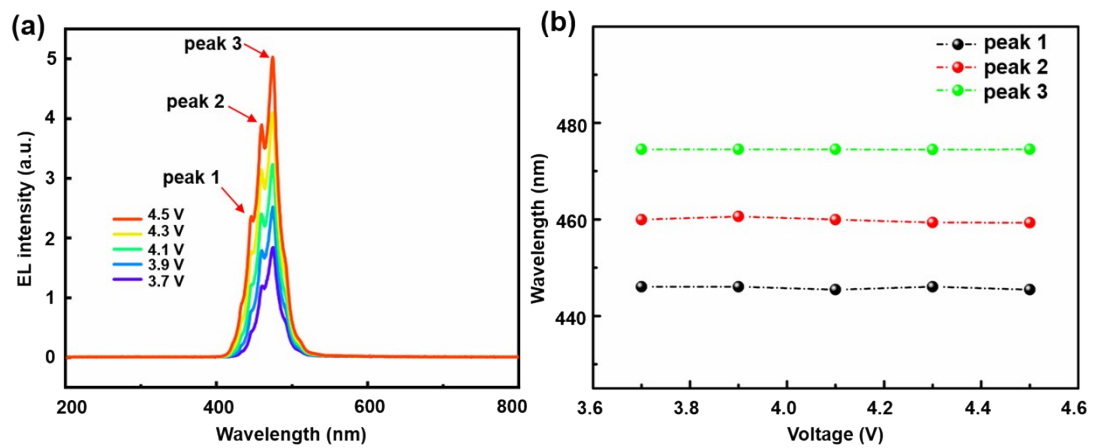

**Fig. S2** The EL spectra from another different position of the membranes LED. (a) The EL spectra of freestanding InGaN/GaN membranes LED from another position. (b) The EL peak position changing of InGaN/GaN membranes LED.
